# Supplementary material for: Upregulation of 15 Antisense Long Non-Coding RNAs in Osteosarcoma
Source: MDPI journal article supplement (doi:10.3390/genes12081132), 2021-07-26
Supplement: s1 [file s1]

## Supplementary Results:

A)

| ENSEMBL            | Symbol | Log2FC      | p-value     | padj        | Transcripts Name                          |
|--------------------|--------|-------------|-------------|-------------|-------------------------------------------|
| ENSG00000165119.21 | HNRNPK | 2.850860127 | 0.003267926 | 0.043691026 | Heterogeneous nuclear ribonucleoprotein K |

B)

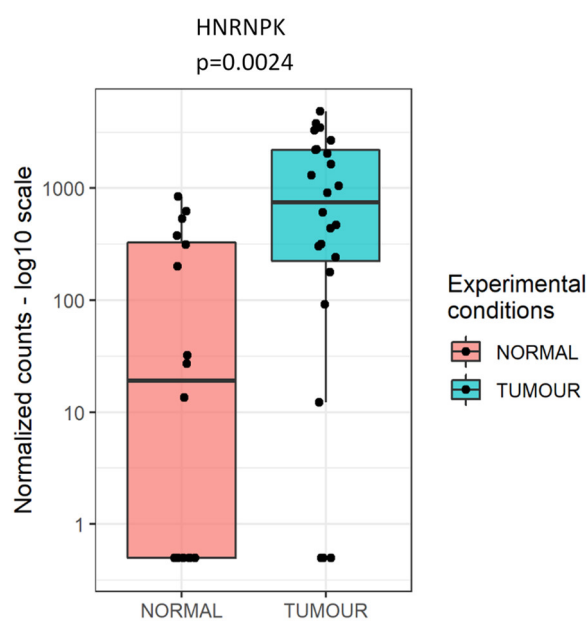

**Figure S1.** Table of upregulation of *HNRNPK* in tumour samples (A) and boxplot of expression level in tumour and normal samples (B). The Y-axis highlights normalized counts – log10 scale, and X-axis represents the sample type. P-value was calculated using Student's t-test,  $p < 0.05$  considered statistically significant.

A)

| ENSEMBL            | Symbol | Log2FC      | p-value     | padj        | Transcripts Name              |
|--------------------|--------|-------------|-------------|-------------|-------------------------------|
| ENSG00000149948.14 | HMGA2  | 3.020716121 | 0.000255172 | 0.019611596 | High-mobility group AT-hook 2 |

B)

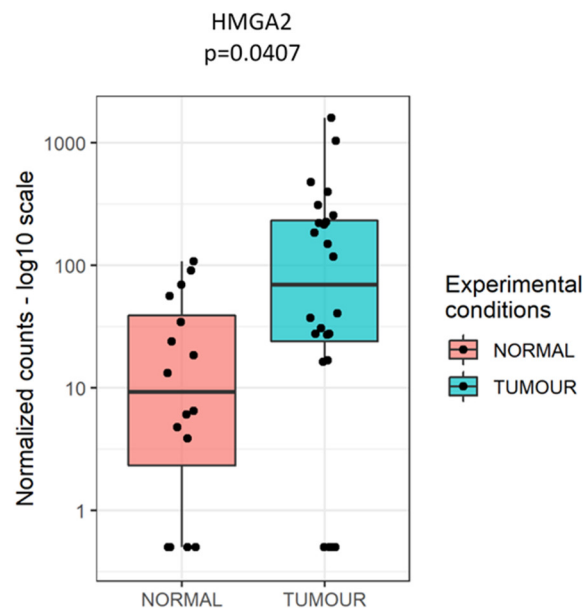

**Figure S2.** Table of upregulation of *HMGA2* in tumour samples (A) and boxplot of expression level in tumour and normal samples (B). The Y-axis highlights normalized counts – log<sub>10</sub> scale, and X-axis represents the sample type. P-value was calculated using Student's t-test,  $p < 0.05$  considered statistically significant.
